# Supplementary material
Source: Springer Nature journal article supplement (https://www.springermedizin.de/resource/supplementary/12936_2006_384_MOESM1_ESM.pdf/9547698)
Supplement: MOESM1 [file 9547698]

**Additional File 1. Pre-test scores and percentage improvement following training for each examination**

| Group                        | N   | <i>Written Examination</i> |                | <i>Picture Score</i> |                | <i>Sensitivity</i> |               | <i>Specificity</i> |                |
|------------------------------|-----|----------------------------|----------------|----------------------|----------------|--------------------|---------------|--------------------|----------------|
|                              |     | Pre-test                   | Improvement    | Pre-test             | Improvement    | Pre-test           | Improvement   | Pre-test           | Improvement    |
| Kenya Research Organizations | 55  | 74% (69-78)*               | 20% (17-23)    | 57% (53-61)          | 21% (18-25)    | 82% (76-88)        | 10% (5-15)    | 84% (78-91)        | 12% (6-18)     |
| Other Country Research Org   | 14  | 63% (55-72)                | 25% (20-30)    | 56% (49-62)          | 24% (16-33)    | 66% (53-79)        | 24% (12-36)   | 81% (66-96)        | 9% (-7-26)     |
| Malaria Control Program      | 6   | 50% (34-65)                | 31% (17-44)    | 53% (44-63)          | 12% (3-22)     | 80% (62-99)        | 8% (-7-22)    | 91% (83-100)       | 4% (.2-9)      |
| Teaching Staff               | 2   | 65% (26-104)               | 23% (NA)       | 56% (-43-154)        | 26% (1-51)     | 61% (-205-327)     | 12% (-23-47)  | 68% (2-135)        | 24% (-10-57)   |
| Private Clinics              | 11  | 57% (48-66)                | 30% (22-37)    | 51% (43-59)          | 25% (15-35)    | 78% (67-88)        | 7% (-9-23)    | 66% (43-89)        | 29% (7-51)     |
| Government Clinics           | 12  | 54% (49-59)                | 35% (30-40)    | 46% (34-57)          | 29% (13-45)    | 67% (53-82)        | 14% (-1-29)   | 67% (55-79)        | 16% (3-30)     |
| Total/Mean                   | 100 | 66% (63-70)                | 24% ** (22-27) | 55% (52-57)          | 23% ** (20-26) | 77% (73-81)        | 12% ** (8-16) | 80% (75-85)        | 14% ** (9-18)  |
| Long Course                  | 77  | 62% (58-65)                | 27% ** (25-30) | 54% (51-57)          | 24% ** (21-27) | 74% (68-79)        | 14% ** (9-19) | 76% (70-82)        | 17% ** (11-23) |
| Short Course                 | 23  | 82% (78-87)                | 15% ** (11-18) | 57% (52-62)          | 18% ** (11-24) | 89% (83-95)        | 6% (-1-12)    | 94% (90-98)        | 3% (-.5-7)     |

\* 95% confidence interval

\*\* p<0.001, comparisons of only total, long, and short pre and post examination means
